# Supplementary material for: PTRAMP, CSS and Ripr form a conserved complex required for merozoite invasion of Plasmodium species into erythrocytes
Source: Research Square preprint supplement (doi:10.21203/rs.3.rs-6292540/v1), 2025-04-27
Supplement: Supplementary file 2 [file e2412d985a809b8b016ed37d.docx]

**PTRAMP, CSS and Ripr form a conserved complex required for merozoite invasion of *Plasmodium* species into erythrocytes**

Benjamin A. Seager1,2, Pailene S. Lim1,2, Keng Heng Lai3, Lionel Brice Feufack-Donfack4, Sheena Dass6, Xiao Xiao1,2, Nicolai C. Jung1,2, Anju Abraham1, Matthew J. Grigg7,8, Nicholas M. Anstey7,8, Timothy William8,9, Jetsumon Sattabongkot10, Andrew Leis1,2, Rhea J. Longley1,2,10, Manoj T. Duraisingh6, Jean Popovici4,5, Danny W. Wilson3,11,12, Stephen W. Scally1,2‡, Alan F. Cowman1,2‡

1 The Walter and Eliza Hall Institute of Medical Research, Parkville 3052, Australia

2 University of Melbourne, Melbourne 3010, Australia

3 Research Centre for Infectious Diseases, School of Biological Sciences, The University of Adelaide, Australia 5005

4 Malaria Research Unit, Institut Pasteur du Cambodge, Phnom Penh, Cambodia

5 Infectious Disease Epidemiology and Analytics G5 Unit, Institut Pasteur, Université Paris Cité, Paris, France

6 Department of Immunology and Infectious Diseases, Harvard T.H. Chan School of Public Health, Boston, MA, USA.

7 Global and Tropical Health Division, Menzies School of Health Research and Charles Darwin University, Darwin, Northern Territory, Australia.

8 Infectious Diseases Society Kota Kinabalu Sabah-Menzies School of Health Research Clinical Research Unit, Kota Kinabalu, Sabah, Malaysia.

9 Clinical Research Centre-Queen Elizabeth Hospital, Ministry of Health, Kota Kinabalu, Sabah, Malaysia.

10 Mahidol Vivax Research Unit, Faculty of Tropical Medicine, Mahidol University, Bangkok 10400, Thailand.

11 Burnet Institute, 85 Commercial Road, Melbourne 3004, Victoria, Australia

12 Institute for Photonics and Advanced Sensing (IPAS), University of Adelaide, 5005, SA, Australia

‡ Correspondence to:

Alan F. Cowman and Stephen W. Scally

Email: [cowman@wehi.edu.au](mailto:cowman@wehi.edu.au) and [scally.s@wehi.edu.au](mailto:scally.s@wehi.edu.au)

**Table S1. Data collection and refinement statistics of PvCSS-PvPTRAMP-D7 structure**

|  | **PvCSS_PvPTRAMP_D7** |
| --- | --- |
| **Beamline** | MX2 |
| **Wavelength** | 0.953739 |
| **Resolution range^** | 48.32 - 3.14 (3.252 - 3.14) |
| **Space group** | P 32 |
| **Cell dimensions** |  |
| **a,b,c (Å)** | 125.2, 125.2, 106.5 |
| **α, β, γ (°)** | 90, 90, 120 |
| **Total reflections** | 174, 965 (17,387) |
| **Unique reflections** | 32, 570 (3,251) |
| **Multiplicity** | 5.4 (5.4) |
| **Completeness (%)** | 99.9 (99.9) |
| **<I/σ I>** | 13.2 (1.5) |
| **Rmerge (%)** | 9.6 (104.5) |
| **Rpim (%)** | 4.6 (49.7) |
| **CC½ (%)** | 99.8 (54.4) |
| **Reflections used in refinement** | 32, 565 (3, 250) |
| **Reflections used for R-free** | 1, 700 (215) |
| **Rwork (%)** | 22.5 (35.4) |
| **Rfree (%)&** | 27.3 (37.3) |
| **Number of non-hydrogen atoms** | 9, 551 |
| **macromolecules** | 9, 551 |
| **Protein residues** | 1, 196 |
| **RMS (bonds) (Å)** | 0.003 |
| **RMS (angles) (°)** | 0.67 |
| **Ramachandran plot** |  |
| **Ramachandran favored (%)** | 92.2 |
| **Ramachandran allowed (%)** | 7.8 |
| **Ramachandran outliers (%)** | 0.0 |
| **Rotamer outliers (%)** | 1.03 |
| **Clashscore** | 7.3 |
| **Wilson B-factor** | 97.5 |
| **Average B-factor** | 93.6 |

^ Statistics for the highest-resolution shell are shown in parentheses. 
& 5% of data were used for Rfree calculation

**Table S2. Table of contacts between PvCSS and PvPTRAMP**

| **PvCSS Residue (BSA Å2)** | **Interaction type** | **PvPTRAMP residue** |
| --- | --- | --- |
| **Arg118 (23.8)** |  |  |
| Arg | VDW | Gly53 |
| ArgN | HB | Gly53O |
| **Ala119 (21.2)** |  |  |
| Ala | VDW | Val52, Gly53 |
| AlaN | HB | Gly53O |
| AlaO | HB | Gy53N |
| **Asn120 (26.0)** |  |  |
| Asn | VDW | Ala51, Val52, Gly53 |
| **Leu121 (52.9)** |  |  |
| Leu | VDW | Cys50, Ala51, Val52, Gly53 |
| LeuN | HB | Ala51O |
| LeuO | HB | Ala51N |
| **Cys122 (38.0)** |  |  |
| Cys | VDW | Glu49, Cys50, Ala51 |
| CysSγ | DSB | Cys50Sγ |
| **Ser123 (41.1)** |  |  |
| Ser | VDW | Pro48, Glu49, Cys50 |
| SerN | HB | Glu49O |
| **Cys124 (3.7)** |  |  |
| Cys | VDW | Glu47, Glu49 |
| **Phe126 (6.3)** |  |  |
| Phe | VDW | Glu47 |
| **Arg129 (42.2)** |  |  |
| Arg | VDW | Leu46, Glu47 |
| **Glu136 (26.9)** |  |  |
| Glu | VDW | Ile43 |
| **Lys137 (62.1)** |  |  |
| Lys | VDW | Lys42, Ile43 |
| LysO | HB | Ile43N |
| **Thr138 (27.9)** |  |  |
| Thr | VDW | Ile43 |
| **Lys139 (77.0)** |  |  |
| Lys | VDW | Lys42, Ile43, Val44, Thr45 |
| LysN | HB | Ile43O |
| LysO | HB | Thr45N |
| **Val140 (35.8)** |  |  |
| Val | VDW | Ile43, Thr45, Glu47 |
| **Val141 (57.8)** |  |  |
| Val | VDW | Val44, Thr45, Leu46, Glu47 |
| ValN | HB | Thr45O |
| ValO | HB | Glu47N |
| **Cys142 (34.2)** |  |  |
| Cys | VDW | Glu47, Pro48 |
| **Asn143 (21.5)** |  |  |
| Asn | VDW | Pro48 |
| **Leu144 (4.0)** |  |  |
| Leu | VDW | Glu49 |

**Table S3. Table of contacts between PvCSS and nanobody D7**

| **PvCSS Residue (BSA Å2)** | **Interaction type** | **Nb_D7 residue^** |
| --- | --- | --- |
| **Glu245 (41.9)** |  |  |
| Glu | VDW | Arg31 |
| GluO | HB | Arg31Nε |
| **Val246 (17.1)** |  |  |
| Val | VDW | Arg31 |
| **Gly247 (33.2)** |  |  |
| Gly | VDW | Arg31, Tyr32 |
| **Glu248 (94.0)** |  |  |
| Glu | VDW | Arg31, Ala33, Asn52, Ser52A, Phe98 |
| GluN | HB | Arg31O |
| GluOε2 | HB | Ser52AN, Ser52AOγ |
| **Tyr250 (64.1)** |  |  |
| Tyr | VDW | Asn52, Asp53, Phe56 |
| TyrOH | HB | Asn52Nδ2, Asp53Oδ2 |
| **Tyr278 (3.5)** |  |  |
| Tyr | VDW | Tyr102 |
| **Lys279 (66.00)** |  |  |
| Lys | VDW | Lys94, Gln96, Tyr100, Asp101, Tyr102 |
| LysNζ | SB | Asp101Oδ1 |
| **His280 (121.3)** |  |  |
| His | VDW | Val2, Phe27, Tyr32, Lys94, Asp101, Tyr102 |
| HisN | HB | Tyr102OH |
| HisO | HB | Lys94Nζ |
| HisNδ1 | HB | Tyr32OH |
| **Asp281 (10.5)** |  |  |
| Asp | VDW | Tyr32, Lys94 |
| AspOδ1 | HB | Tyr32OH |
| **Ser283 (37.9)** |  |  |
| Ser | VDW | Lys94, Gln96, Asp101 |
| **Ser285 (19.7)** |  |  |
| Ser | VDW | Gln96, Ala97, Phe98 |
| **Ile287 (21.6)** |  |  |
| Ile | VDW | Phe98 |
| **Leu289 (23.2)** |  |  |
| Leu | VDW | Phe56 |
| **Lys349 (4.6)** |  |  |
| Lys | VDW | Tyr58 |
| **Asn350 (13.5)** |  |  |
| Asn | VDW | Tyr58 |
| AsnO | HB | Tyr58OH |
| **Phe351 (8.8)** |  |  |
| Phe | VDW | Tyr58 |
| PheN | HB | Tyr58OH |
| **Asn352 (83.2)** |  |  |
| Asn | VDW | Asp50. Tyr58, Phe98, Gly99 |
| AsnNδ2 | HB | Asp50Oδ2 |
| **Ala354 (43.6)** |  |  |
| Ala | VDW | Phe98, Gly99, Tyr100 |
| **Cys355 (1.7)** |  |  |
| Cys | VDW | Tyr100 |
| **Ala356 (13.8)** |  |  |
| Ala | VDW | Tyr100 |
| **Lys372 (36.3)** |  |  |
| Lys | VDW | Gln96, Tyr100 |
| LysNζ | HB | Gln96Oε1, Tyr100OH |
| **Ile374 (41.6)** |  |  |
| Ile | VDW | Gln96, Ala97, Tyr100 |
| **Thr376 (16.1)** |  |  |
| Thr | VDW | Ala97, Phe98 |
| ThrOγ1 | HB | Phe98O |
| **Tyr378 (57.2)** |  |  |
| Tyr | VDW | Phe56, Thr57, Tyr58, Phe98 |
| TyrOH | HB | Thr57O |
| **Phe379 (0.6)** |  |  |
|  |  |  |
| Phe | VDW | Tyr58 |
| **Asn380 (13.4)** |  |  |
| Asn | VDW | Thr57, Tyr58 |

^D7 Residues are labelled according to the Kabat numbering system


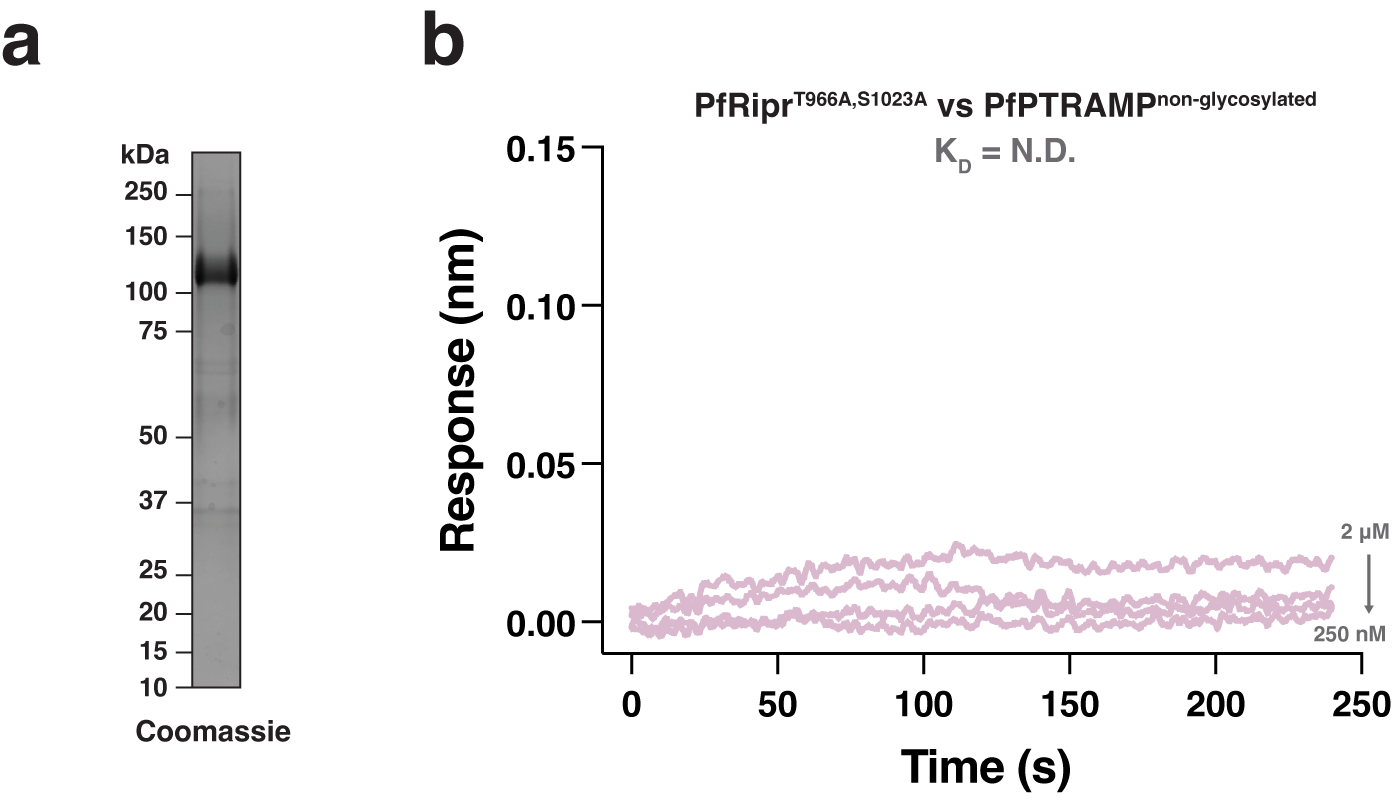


**Supplementary figure 1. Non-glycosylated forms of monomeric PfPTRAMP and PfRipr do not interact with one another. a.** SDS-PAGE of purified recombinant PfRiprT966A,S1023A **b.** Biolayer interferometry sensorgram of PfRiprT966A,S1023A vs PfPTRAMPnon-glycosylated .


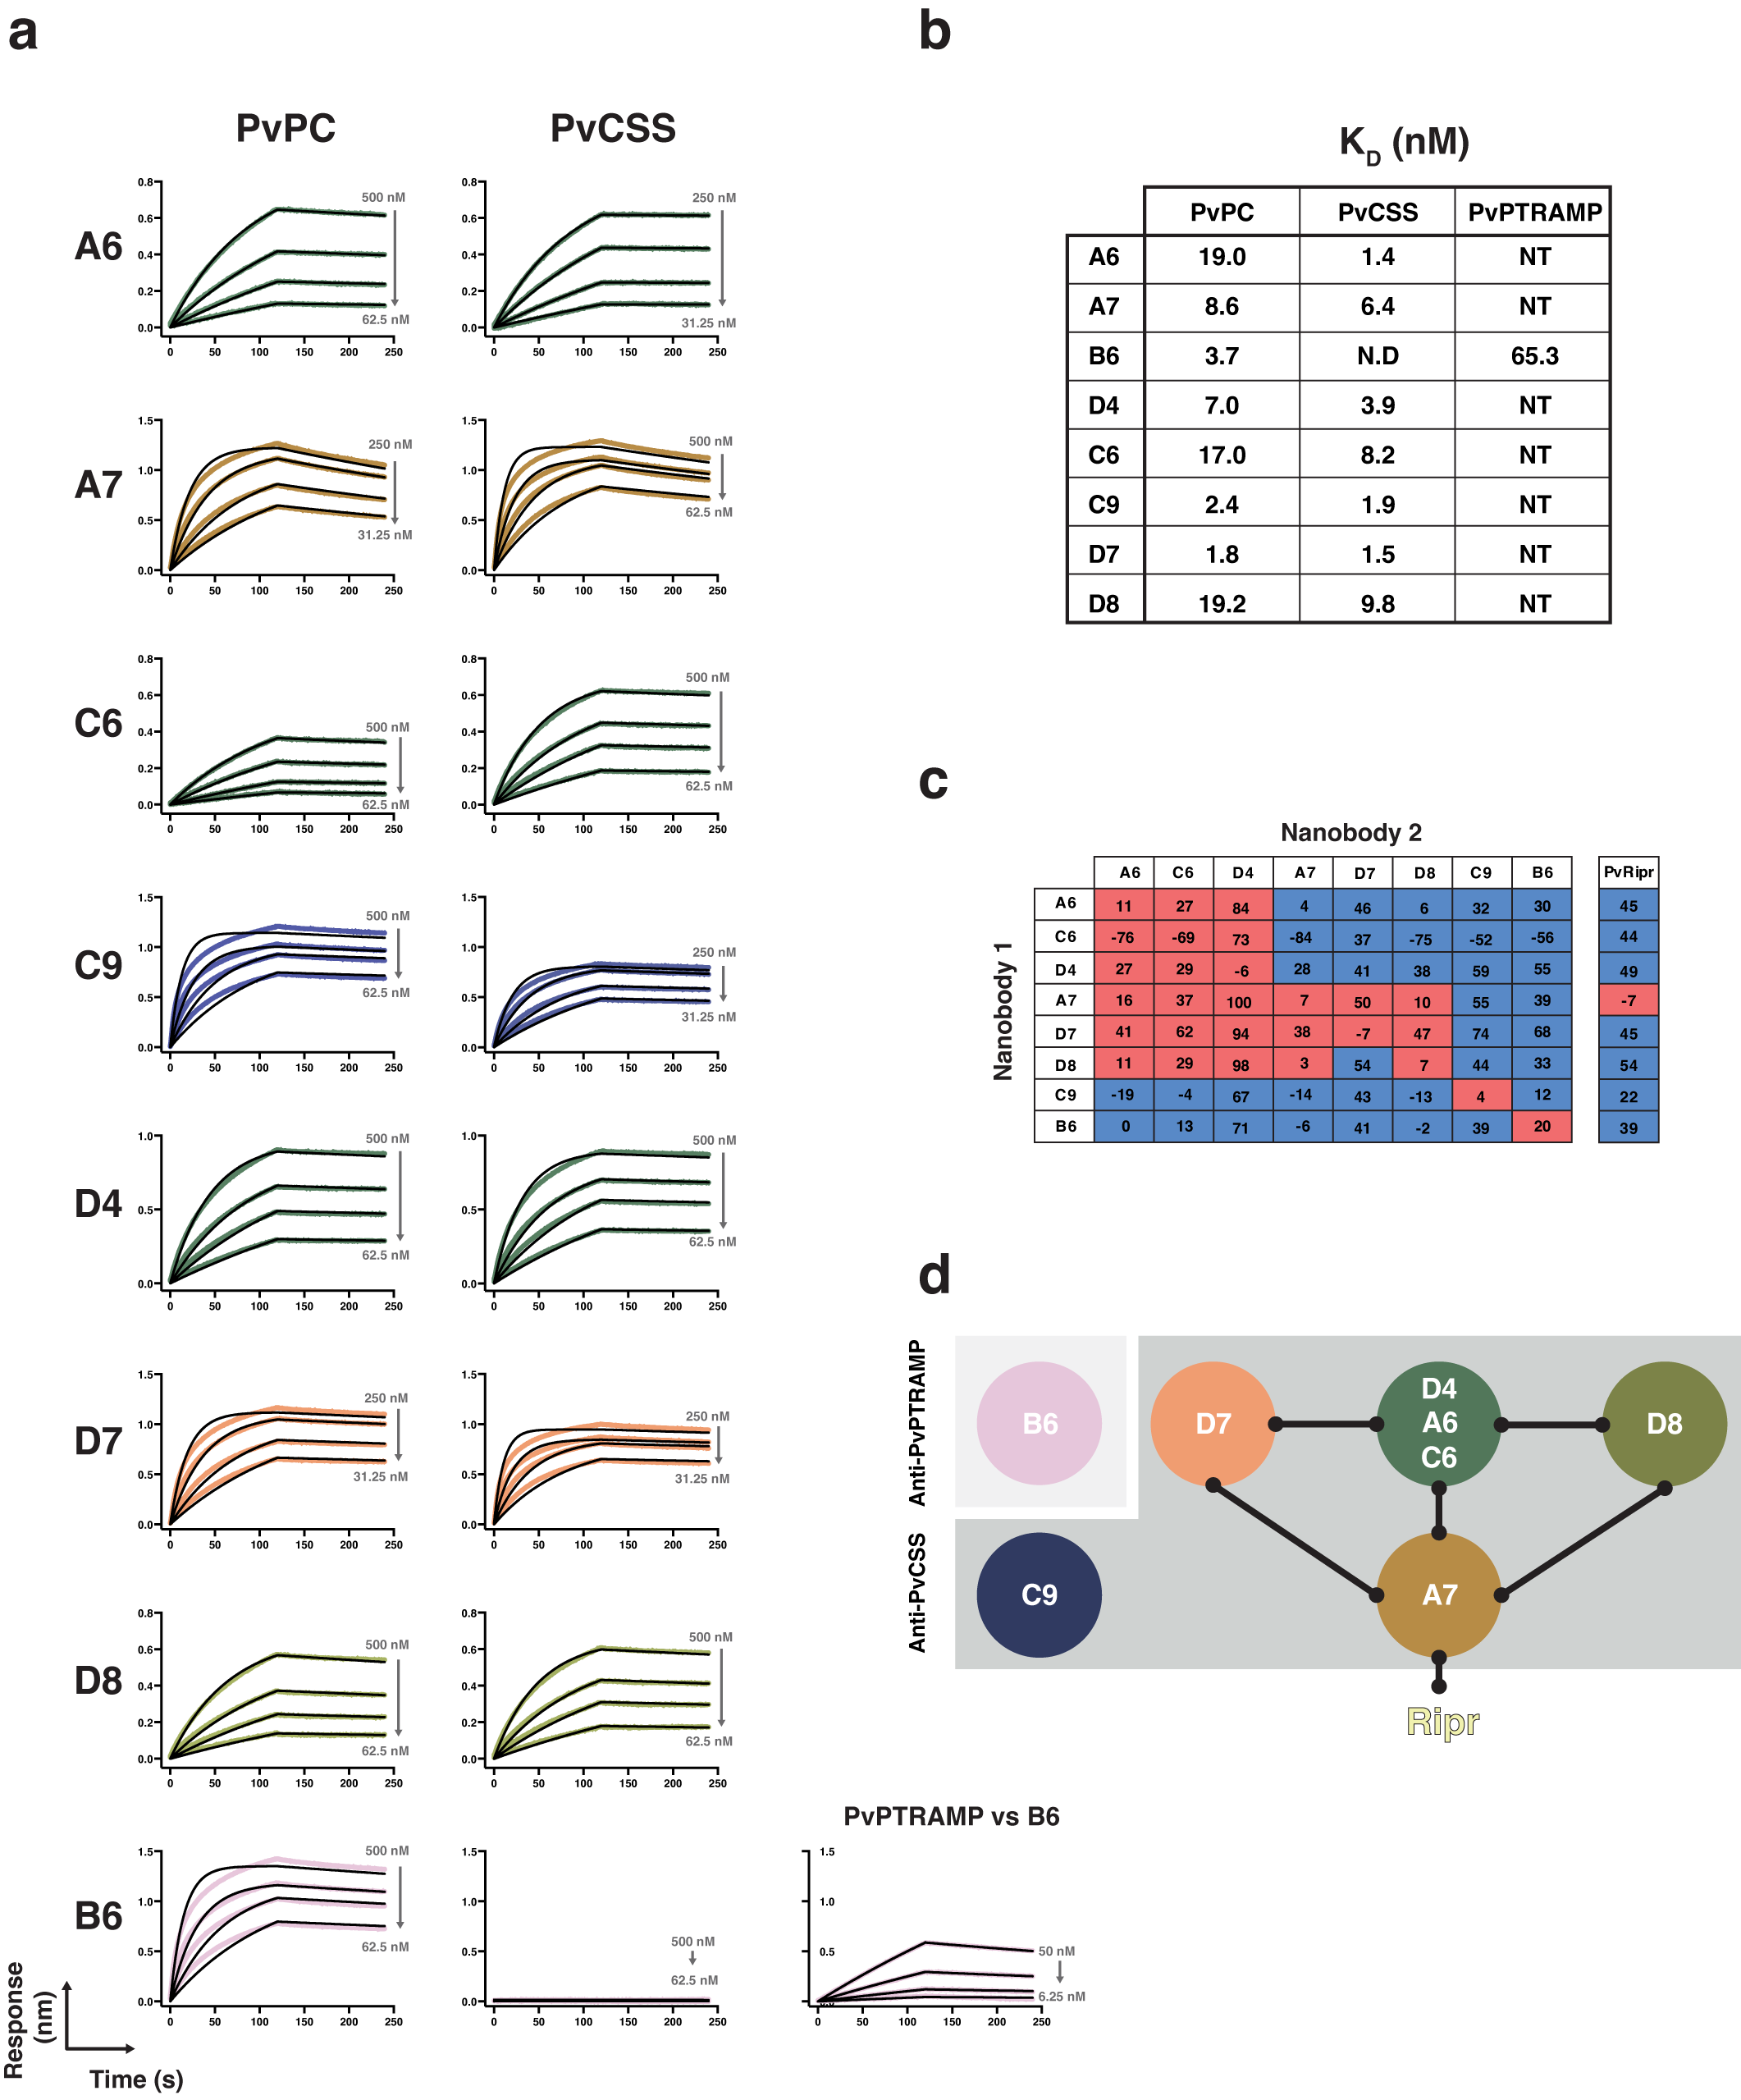


**Supplementary figure 2. Characterisation of anti-PvPC nanobodies. a.** Biolayer interferometry sensorgrams of nanobodies binding to PvPC, PvCSS or PvPTRAMP. Data are shown in color and the 1:1 model best fit shown in black. **b.** Table of KD values for nanobodies against PvPC and PvCSS. N.D = not determined, NT= not tested. **c-d.** Epitope binning of nanobodies. Boxes are colored on a sliding scale where red represents a competing nanobody and blue represents no competition. Epitope bins from competition with PvRipr are represented in (D). The competition table in (C) has been normalized to the greatest response, which was arbitrarily set to 100. Nanobodies that compete with one another or with Ripr binding are connected with black bars.


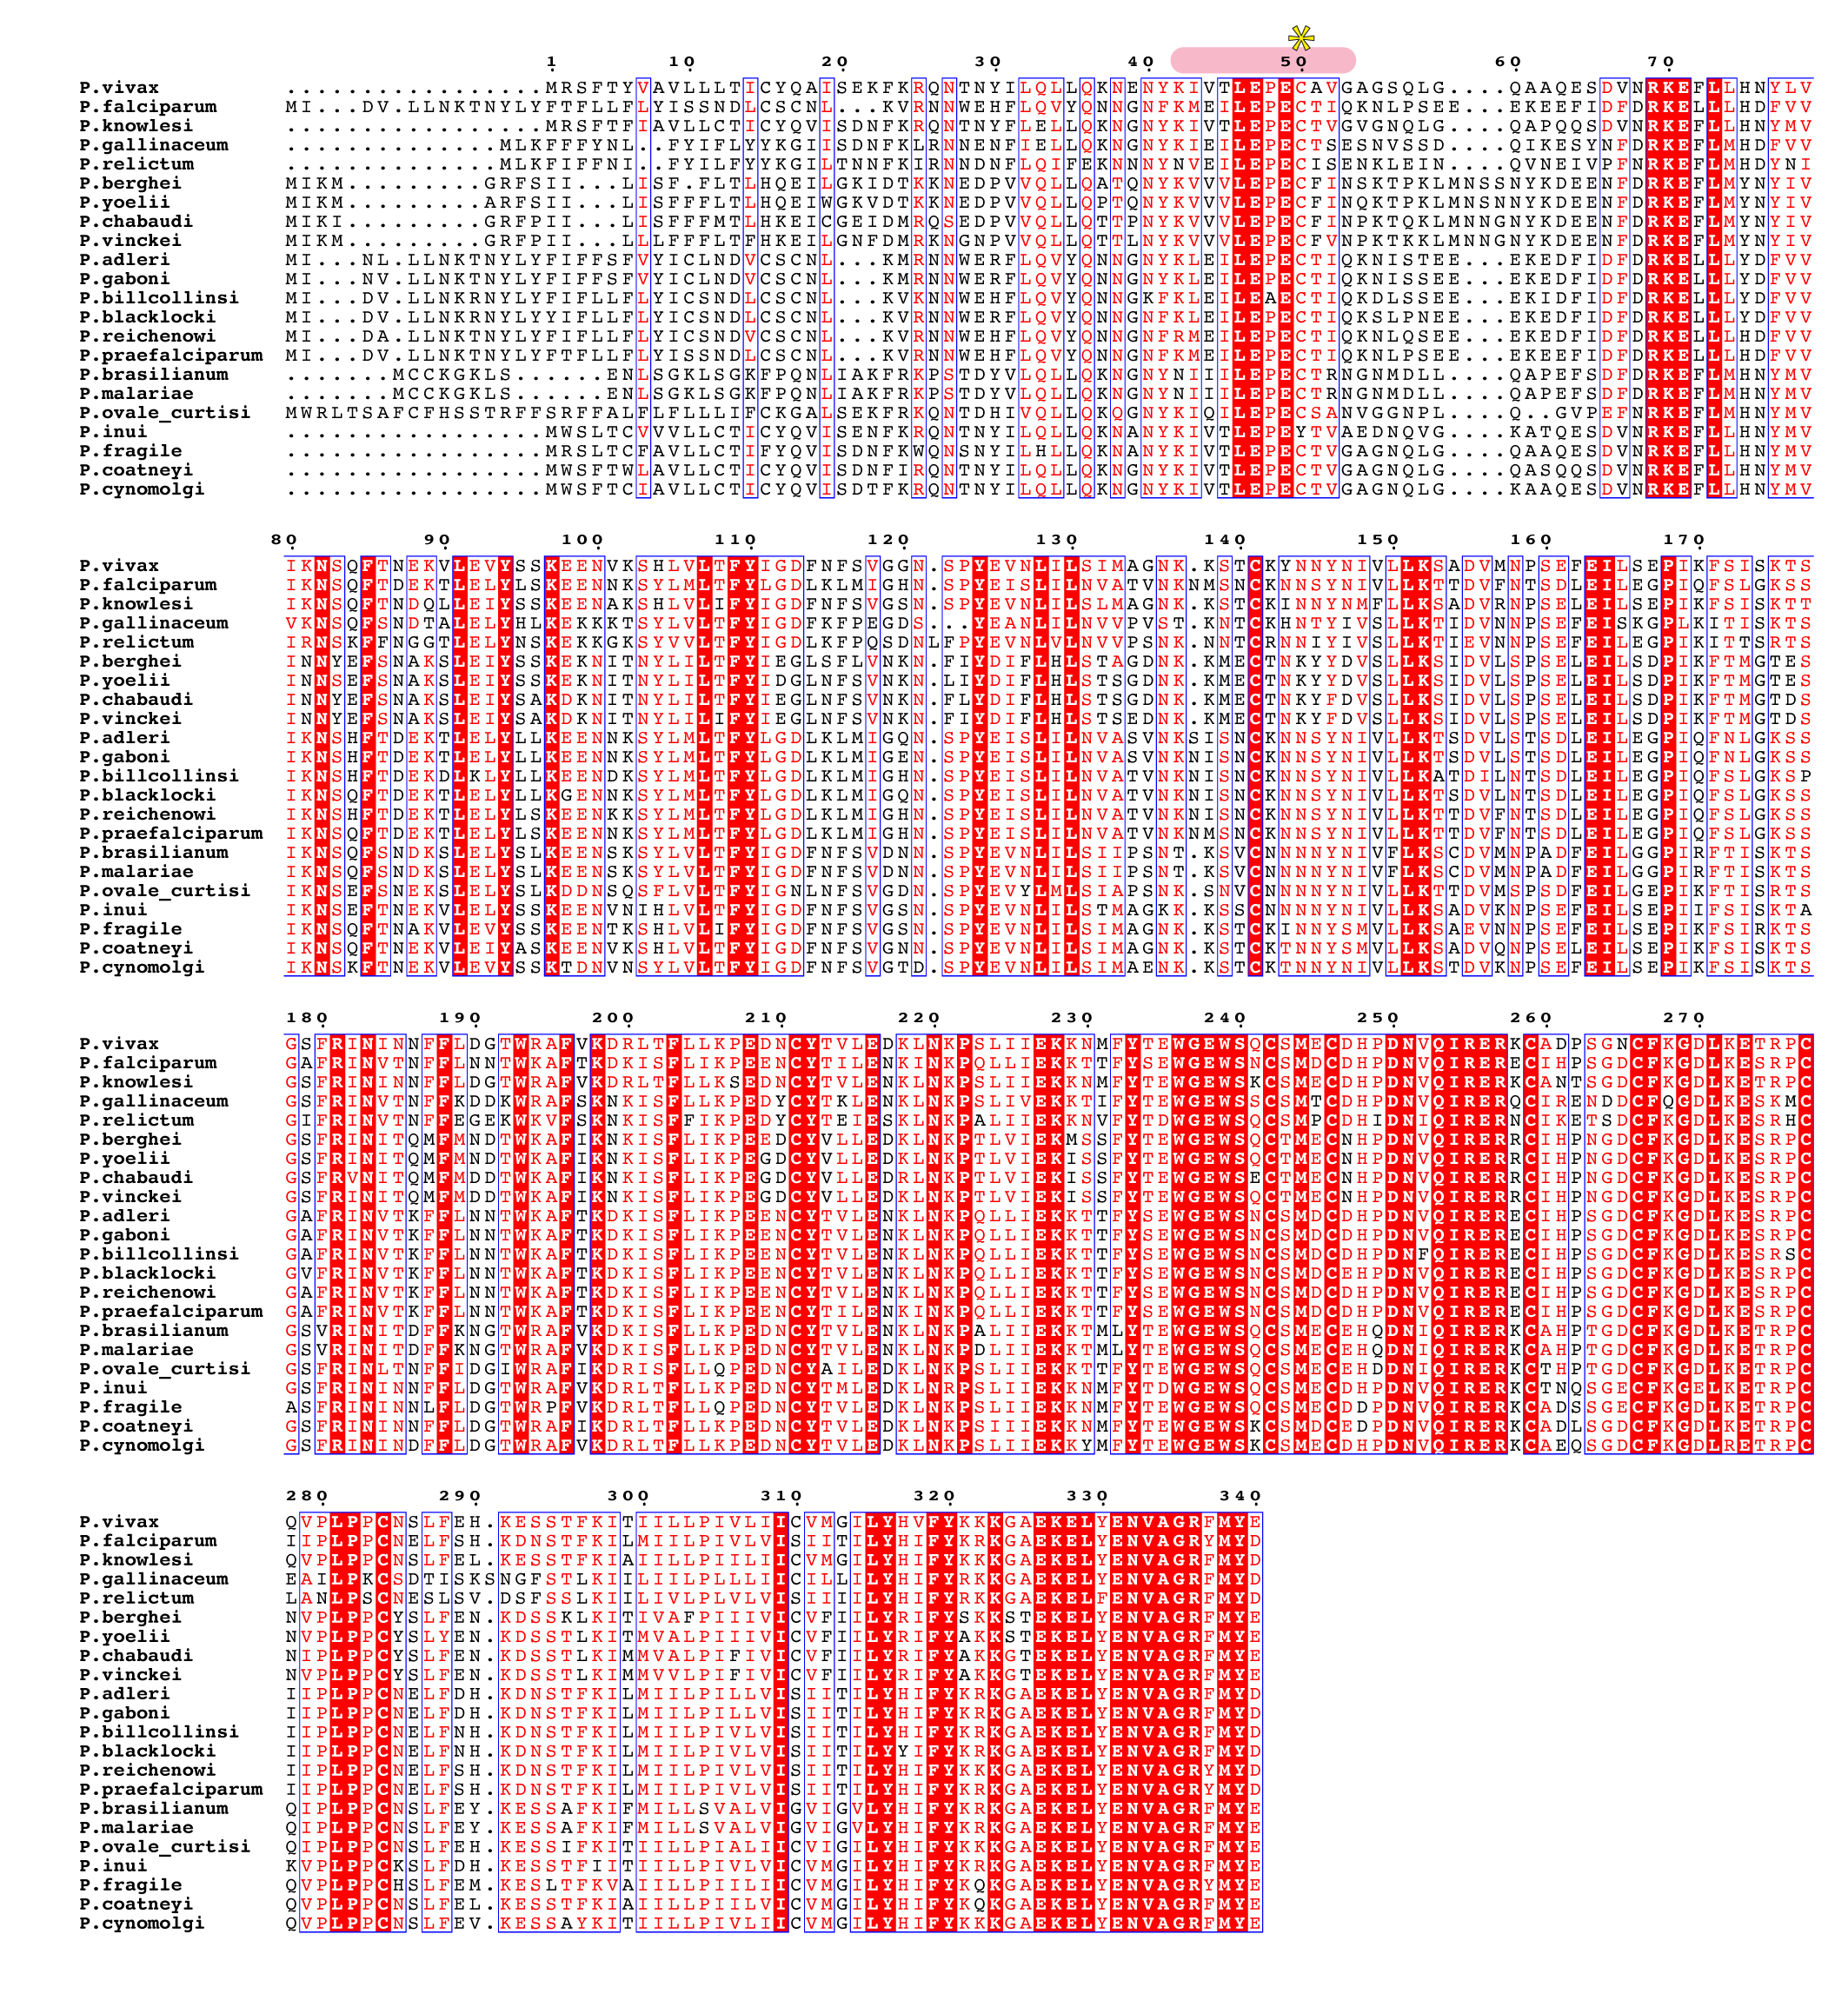
**Supplementary figure 3. Comparison of PTRAMP sequences from a selection of *Plasmodium* species.** Multiple sequence alignment of PTRAMP from several *Plasmodium* species. Regions involved in PvCSS binding are indicated with pink above the interacting amino acids. The unpaired cysteine involved in intermolecular disulfide formation is marked with a yellow asterisk.


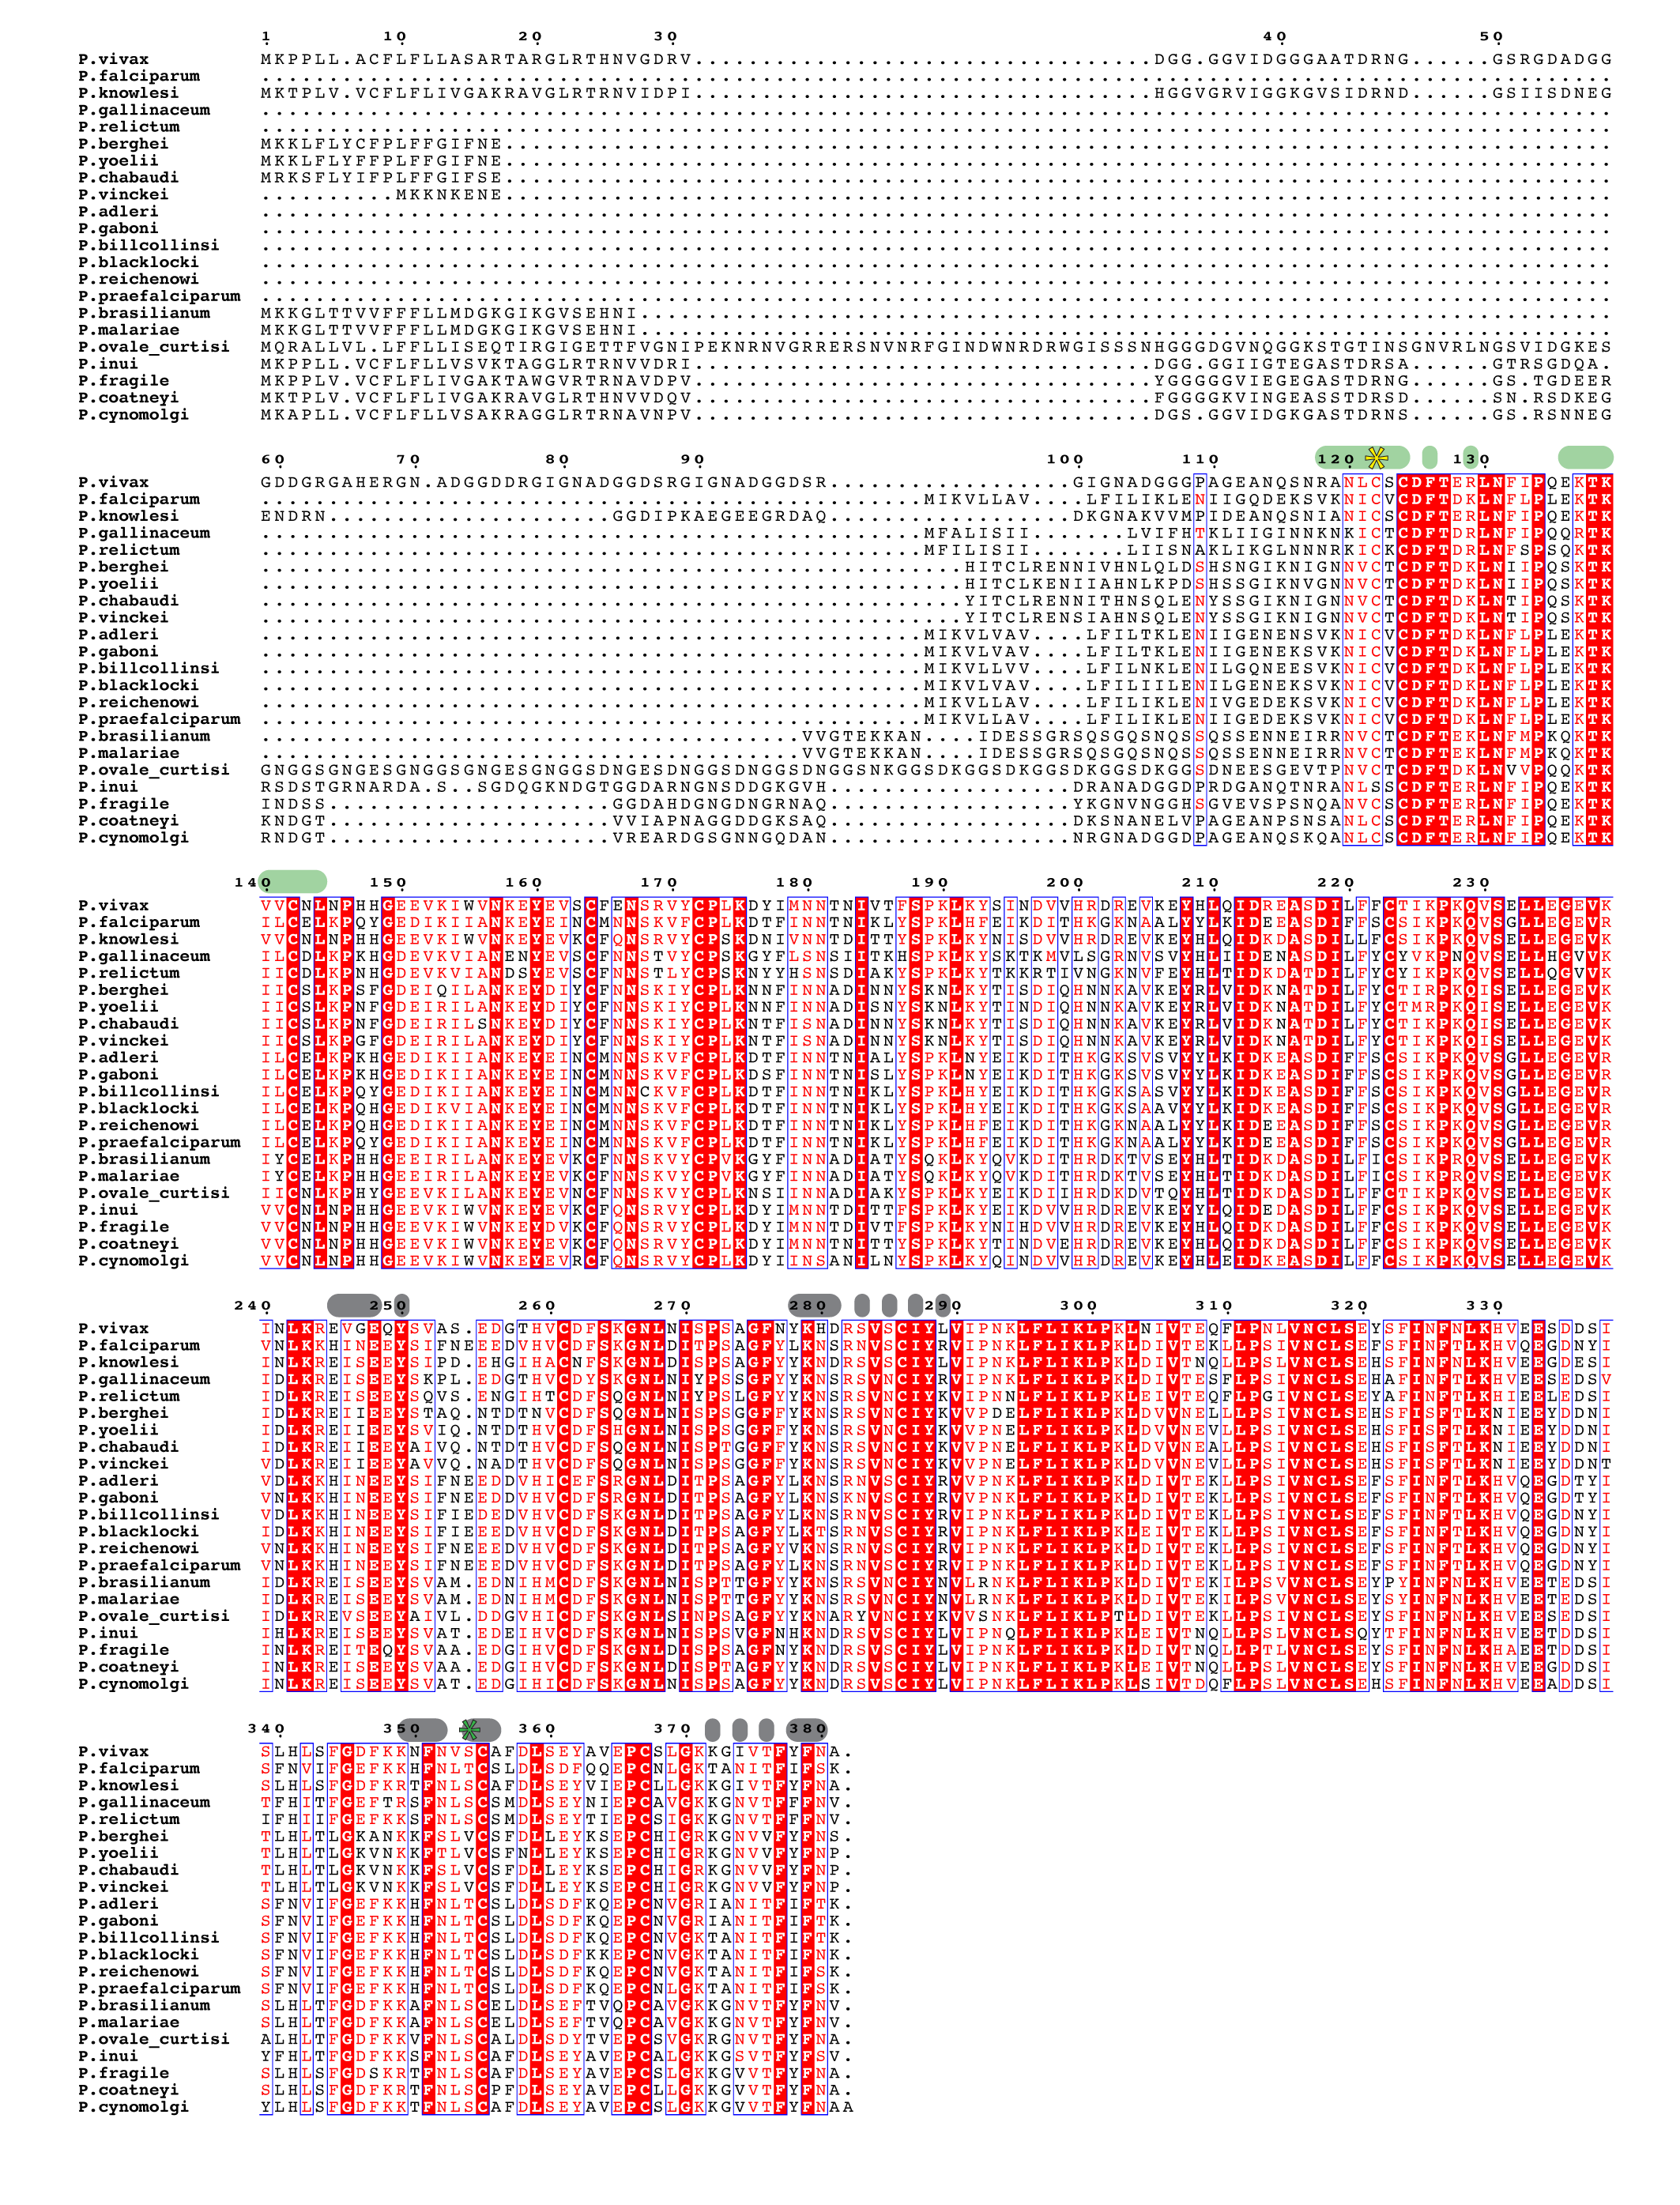


**Supplementary figure 4. Comparison of CSS sequences from a selection of Plasmodium species.** Multiple sequence alignment of CSS from several Plasmodium species. Regions involved in PvPTRAMP binding are indicated by green above the interacting amino acids. Regions involved in the D7 interface are marked grey. The unpaired cysteine involved in intermolecular disulfide formation is marked with a yellow asterisk. The Ser354 that was mutated to remove a potential N-linked glycan is marked by a green asterisk.
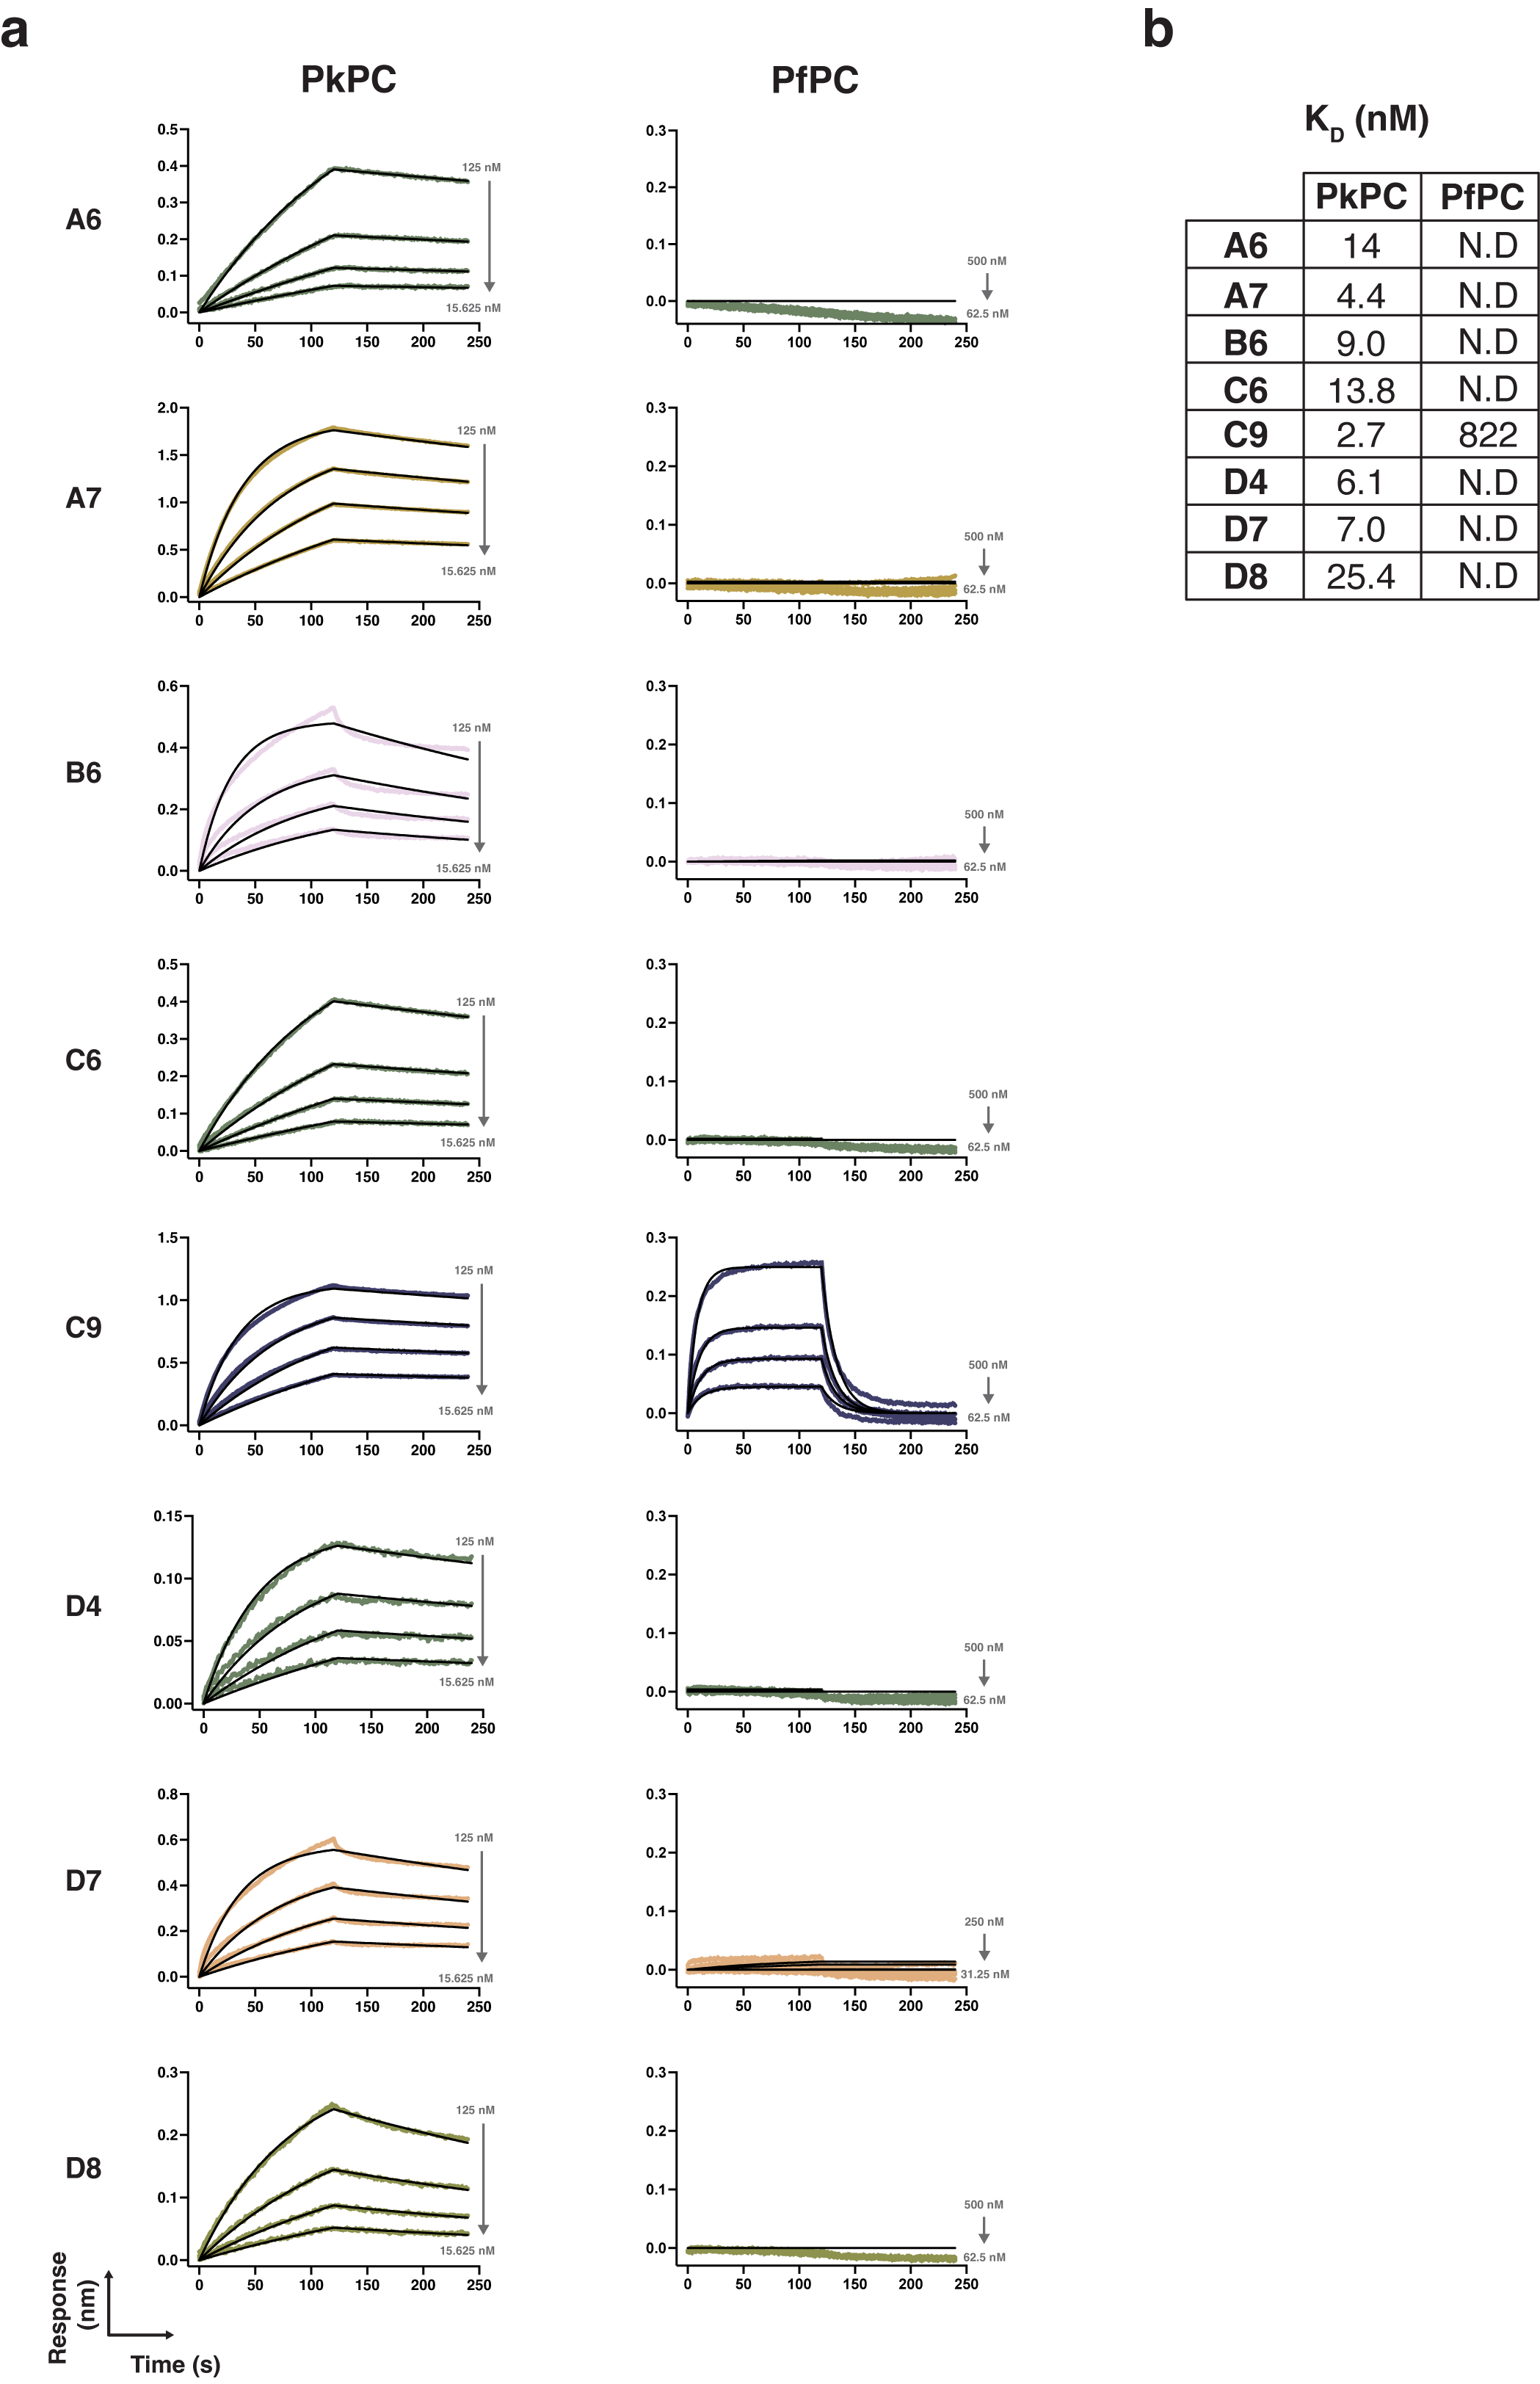
**Supplementary figure 5. Anti-PvPC nanobodies broadly cross-react with PkPC, but not PfPC. a.** Representative biolayer interferometry sensorgrams of nanobody binding to PkPC and PfPC. Data are in color and 1:1 model best fit in black. **b.** Table of KD values, in nM, for the curves in a). N.D. = not determined.


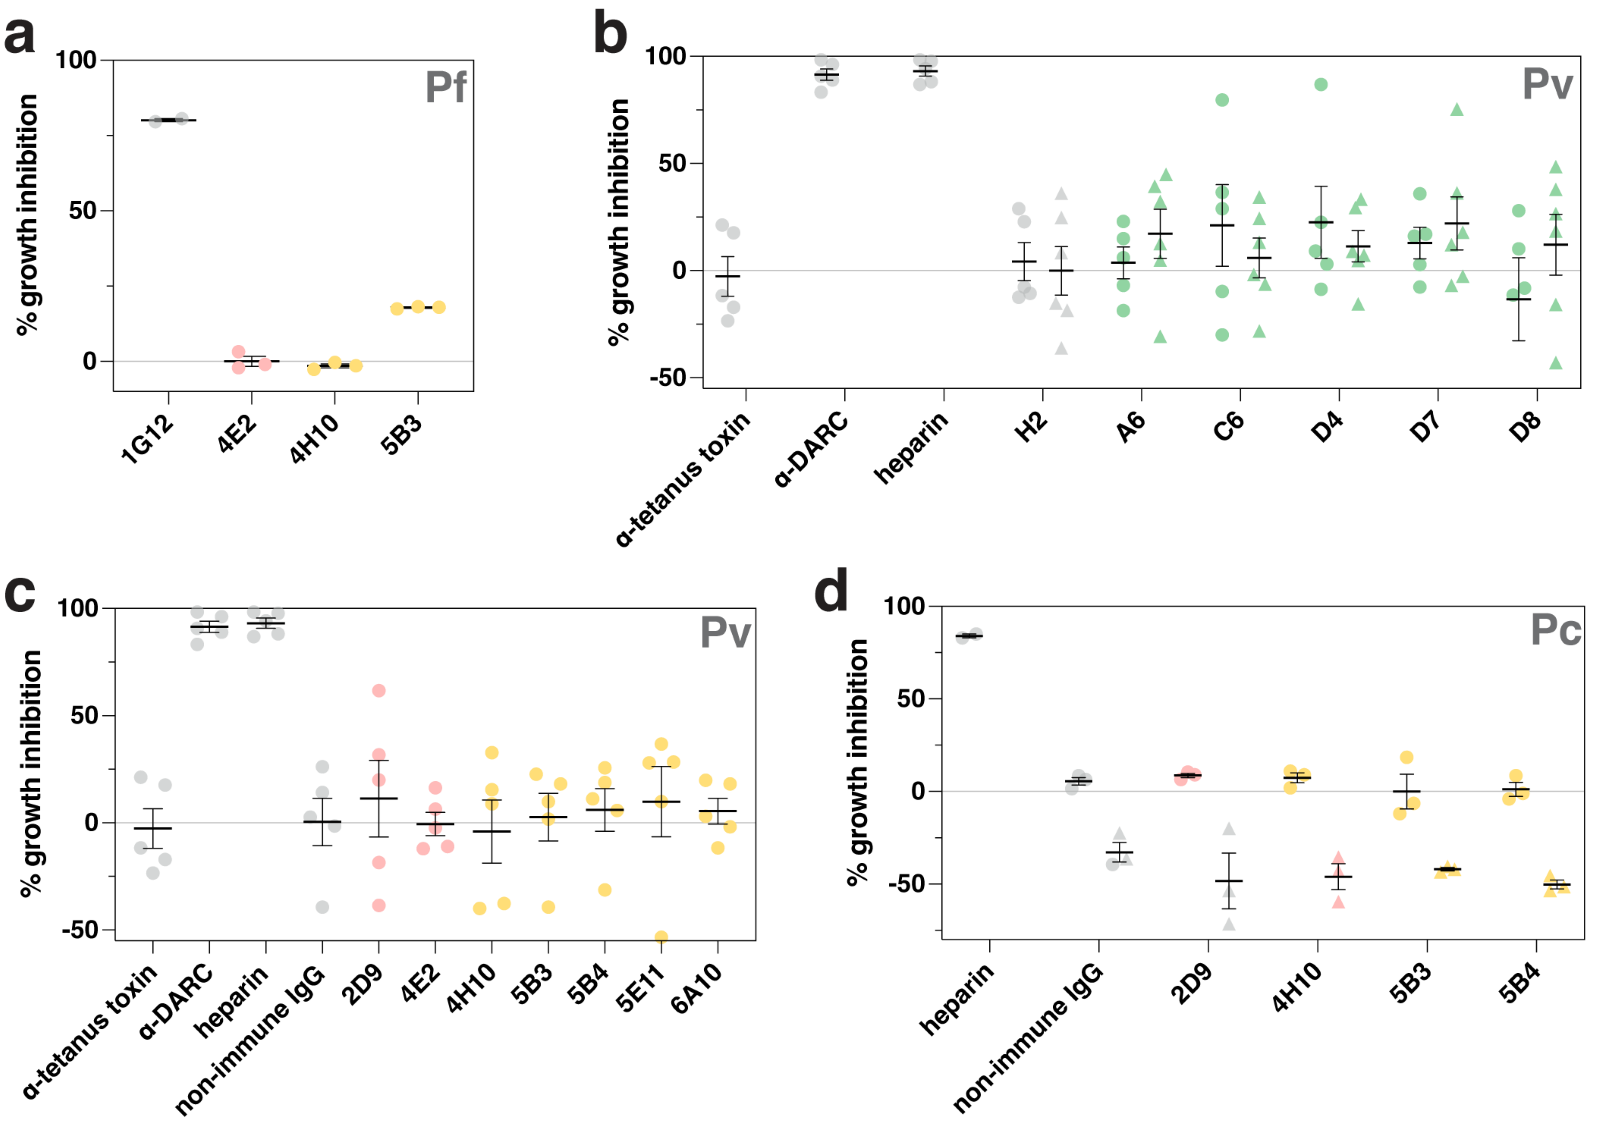
**Supplementary figure 6. Growth-inhibition assays of antibodies and nanobodies against *P. falciparum, P. vivax,* and *P. cynomolgi*****a*.***Initial screening of cross-reactive antibodies against *P. falciparum.* Antibodies were tested at a final concentration of 0.5 mg/mL for 4E2, 4H10, and 5B3, and at 1 mg/mL for 1G12 (anti-PfRipr antibody). Three biological replicates are plotted for anti-PvPC and anti-PvRipr antibodies, and two biological replicates are plotted for 1G12 **b.** *Ex vivo* growth inhibition assay of *P. vivax* parasites testing anti-PvCSS nanobodies. Circles and triangles represent 100 μg/mL and 0.5 mg/mL final concentration, respectively. Data are from five (100 μg/mL) and six (0.5 mg/mL) independent experiments. The anti-PfCSS nanobody, H2, was used as a negative control **c.** *Ex vivo* growth inhibition assay of *P. vivax* parasites. Antibodies were tested at a final concentration of 100 μg/mL. Data are from five independent experiments **d.** *P. cynomolgi* growth inhibition assay of anti-PvPC and anti-PvRipr antibodies. Three independent experiments were performed. Circles and triangles represent 125 μg/mL and 2 mg/mL final concentration, respectively. All panels show the mean and SEM.
